# Supplementary material
Source: PubMed Central journal article supplement (PMC3367443)
Supplement: supp_139.13.2330_DEV076299TablesS1-S4.pdf [file supp_139.13.2330_DEV076299TablesS1-S4.pdf]

**Table S1.** The target sequences for rat siRNA

| -                        | Sequence                                                                                 |
|--------------------------|------------------------------------------------------------------------------------------|
| rCOUP-TFI single         | GUUUCUUCAAGAGGAGCGUtt                                                                    |
| rCOUP-TFII-1             | GGAGGAACCUGAGCUACAC                                                                      |
| rCOUP-TFII-2             | CCUCAGUCAUAGAGCAAUU                                                                      |
| rCOUP-TFII pooled        | GUACCUGUCCGGAUUAUUAU<br>GGAGGAACCUGAGCUACAC<br>CCUCAGUCAUAGAGCAAUU<br>CAUACAUGGCAAUCAAUA |
| rSp1 single              | GGAUGGUUCUGGUCAAAUA                                                                      |
| rOsr1 sense<br>antisense | GCAGCUUACCAAUUACUCUTT<br>AGAGUAAUUGGUAAGCUGCAG                                           |

**Table S2.** The primer sequences for quantitative RT-PCR

| Gene       | Primer sequences        | Gene    | Primer sequences          |
|------------|-------------------------|---------|---------------------------|
| rCOUP-TFI  | F: ACAGGAACTGTCCCATCGAC | rSix2   | F: CAGGTCAGCAACTGGTTCAA   |
| -          | R: GATGTAGCCGGACAGGTAGC | -       | R: ATGGTAAACCAGGCTGTCGT   |
| rCOUP-TFII | F: CGGAGGAACCTGAGCTACAC | rWt1    | F: CAGGATGTTCCCAATGC      |
| -          | R: CAGGTACGAGTGGCAGTTGA | -       | R: GGCCTCGTGTTTGAAGGAA    |
| rGdnf      | F: CGAAACCAAGGAGGAACTGA | rOsr1   | F: CTGCCCAACCTGTATGGTTT   |
| -          | R: ATGGTAAACCAGGCTGTCGT | -       | R: TAGGGTGAATGACGTGTGGA   |
| rEya1      | F: GAGCAGCAGCGAAATAGCTT | 18s RNA | F: TCCGATAACGAACGAGACTC   |
| -          | R: ATGGTAAACCAGGCTGTCGT | -       | R: CAG G GACTTAATCAACGCAA |

F, forward; R, reverse

**Table S3.** The primer sequences for ChIP

| Gene      | Primer sequences         |
|-----------|--------------------------|
| rEya1     | F: GAGGGCTCAACTGCTGTTTC  |
| -         | R: GAGATTGCTTTGCGTGTTGA  |
| rEya1-neg | F: TGCCAAAACAAAACACAACAA |
| -         | R: CTGGGCTAACGTCAGGATTC  |
| rWt1      | F: CAGCTTCCCAAAGCTCAAAT  |
| -         | R: GAGGGTGTCTCCGAGAAGAA  |
| rWt1-neg  | F: TTCCAGGTCATGCACTCAAG  |
| -         | R: ATTGAAGAAGGCATGGGCTA  |

F, forward; R, reverse

**Table S4.** The primer sequences for promoter constructs

|                   |                                                           |
|-------------------|-----------------------------------------------------------|
| Eya1-pro-Kpn -5'  | AAGGTACCTTCTGGAAGAAGGGCAGTG                               |
| Eya1-pro-Xho -3'  | AAACTCGAGTGTGCCCAGTTGAAAAA                                |
| Eya1-XhoI-5'-M1   | TTTTTCTTTATCTCTATTTTCAGCTGGTGATAAC                        |
| Eya1-KpnI-3'-M1   | GATAAAGAAAAAACCTTTGACTCCTGACAGTTTC                        |
| Eya1-XhoI-5'-M2   | TAAAAAAAAAATAATCCCATTGTCAGCTGTCAT                         |
| Eya1-KpnI-3'-M2   | TATTTTTTTTTTAATCAACATGCAAAGCAGCCT                         |
| Eya1-XhoI-5'-M3   | AAAAAAAAATTAATAAGACCTGCAGGAGGAAACAACAGT                   |
| Eya1-KpnI-3'-M3   | TCTATTTTAATTTTTTTTTTTGTCAGGGGGG                           |
| WT1-pro-KpnI-5'   | AAGGTACCGTTTGCCCAAGGGTTTTCTT                              |
| WT1-pro- BglII-3' | AAAGATCTGCTGCTCTGGCTGCTGTAG                               |
| WT1-BglII-5'-M1   | GTAAAGAAATATTGGAGCCTACCTGAAAATAAAATAAAAACCACTCTTTTAGATTAA |
| WT1-Kpn-3'-M1     | TTATTTATTTTCAGGTAGGCTCCAATATTTCTTTAACTTCAGGAAAGCGCAGAA    |
| WT1-BglII-5'-M2   | GGAAAAGAAATAACCCAGCTGCGAGGGCGCC                           |
| WT1-KpnI-3'-M2    | TTATTTCTTTTCCGAGGGAGCGTCCCTCTCG                           |
